# Supplementary material
Source: PubMed Central journal article supplement (PMC5736306)
Supplement: NIHMS925747-supplement-Table.pdf [file NIHMS925747-supplement-Table.pdf]

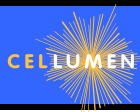

| Classification                                                                       |  | Safety Rank     | Safety Risk Index       |                          |       |
|--------------------------------------------------------------------------------------|--|-----------------|-------------------------|--------------------------|-------|
|                                                                                      |  | <b>1/194</b>    | <b>High Risk</b>        |                          |       |
| Indicators                                                                           |  | #               | Measured Effects        |                          |       |
|                                                                                      |  |                 | 1 hr                    | AC <sub>50</sub> (M)     |       |
|                                                                                      |  |                 |                         | 24 hr                    | 48 hr |
| <b>Maximum Tolerated Dose</b>                                                        |  |                 | >70% Cell Loss          |                          |       |
| <b>Earliest Toxic Indicator</b>                                                      |  |                 | Cell Loss               |                          |       |
| <b>Most Sensitive Toxic Indicator</b>                                                |  |                 | Cell Loss               |                          |       |
| <b>General Indicators of Toxicity</b>                                                |  | <b>1</b>        | Cell Loss               |                          |       |
|                                                                                      |  | <b>2</b>        | Nuclear Size            |                          |       |
| <b>Mechanistic Indicators</b>                                                        |  | <b>3</b>        | DNA Damage Response     |                          |       |
|                                                                                      |  | <b>4</b>        | Apoptosis               |                          |       |
|                                                                                      |  | <b>5</b>        | Lysosomal Mass          |                          |       |
|                                                                                      |  | <b>6</b>        | DNA Fragmentation       |                          |       |
|                                                                                      |  | <b>7</b>        | Mitochondrial Potential |                          |       |
|                                                                                      |  | <b>8</b>        | Steatosis               |                          |       |
|                                                                                      |  |                 | *                       | - Excluded               |       |
|                                                                                      |  |                 |                         | - No Activity            |       |
|                                                                                      |  |                 |                         | - Not Measured           |       |
| Compound Correlations                                                                |  | Within Test Set |                         | With CellCiphr® Database |       |
| <b>Compounds with a threshold Pearson's correlation coefficient of 0.8 or higher</b> |  |                 |                         |                          |       |

**Profile Similarity Plots**

**Profile Similarity Within Test Set**

Report compound (yellow)  
Compounds in this set (r, g & b).  
X-axis: Acute, Early and Chronic Features #1-10 as above.  
Y-axis: - Log(AC50) (3 = mM, 9 = nM)

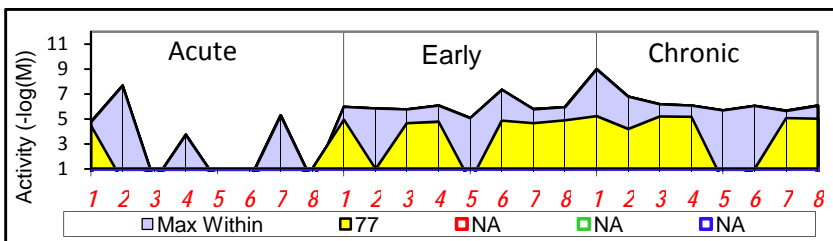

**Profile Similarity With CellCiphr DB**

Report compound (yellow)  
CellCiphr DB compounds (r, g & b).  
Gray background represents maximum response in the set (top) and DB (bottom)

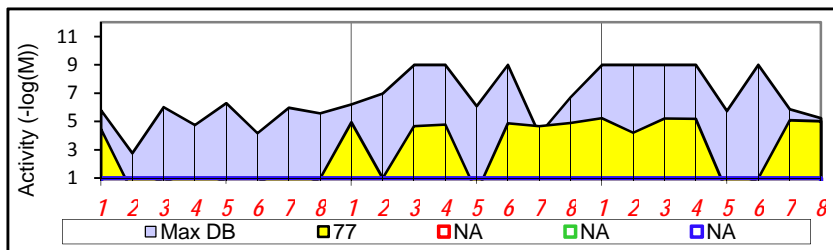

**Observations on Compound Physical Properties**

CellCiphr Hepatocyte Plate 1 Acute

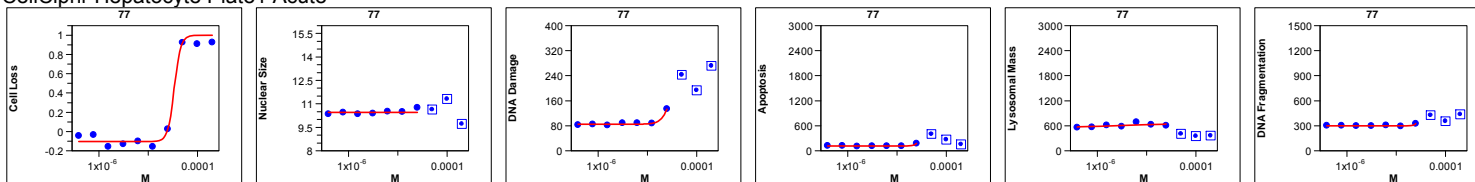

CellCiphr Hepatocyte Plate 2 Acute

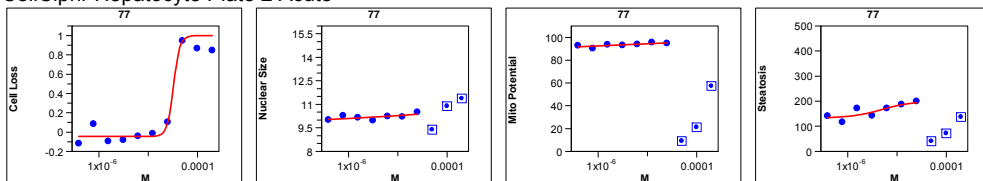

CellCiphr Hepatocyte Plate 1 Early

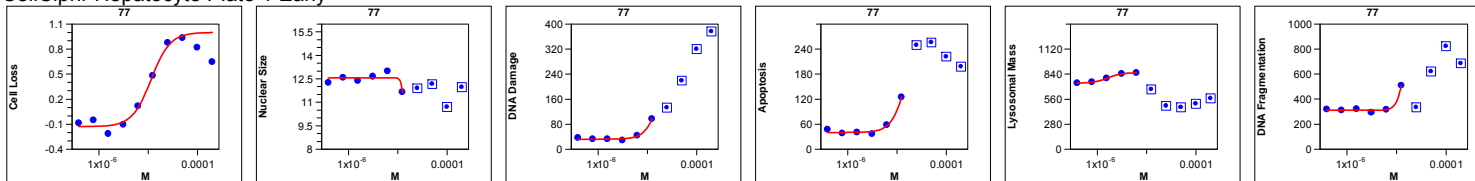

CellCiphr Hepatocyte Plate 2 Early

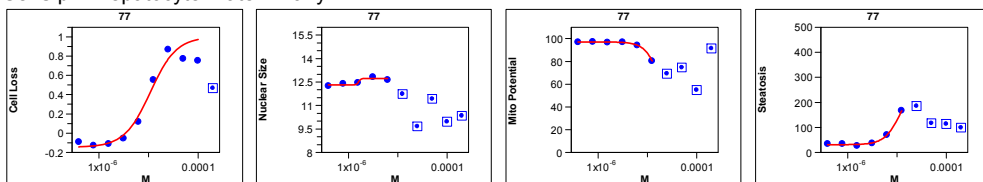

CellCiphr Hepatocyte Plate 1 Chronic

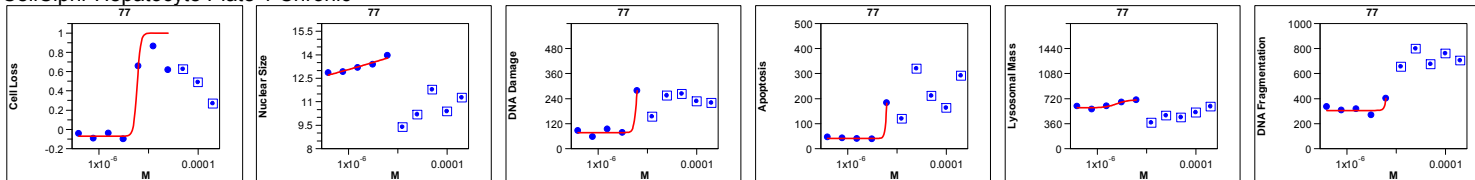

CellCiphr Hepatocyte Plate 2 Chronic

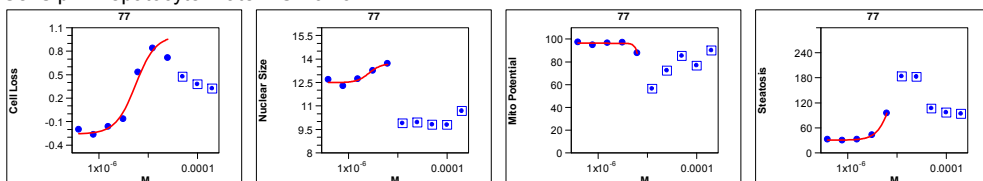

**CellCiphr Hepatocyte Plate 1 Acute**

| Feature <b>Cell Loss</b> |         |          | Feature <b>Nuclear Size</b> |         |         | Feature <b>DNA Damage</b> |         |          | Feature <b>Apoptosis</b> |         |          | Feature <b>Lysosomal Mass</b> |         |          | Feature <b>DNA Fragmentation</b> |         |          |
|--------------------------|---------|----------|-----------------------------|---------|---------|---------------------------|---------|----------|--------------------------|---------|----------|-------------------------------|---------|----------|----------------------------------|---------|----------|
| Curve Fit                |         |          | Curve Fit                   |         |         | Curve Fit                 |         |          | Curve Fit                |         |          | Curve Fit                     |         |          | Curve Fit                        |         |          |
| AC50                     | 3.4E-05 | Mean 129 | AC50                        | 1.1E-03 | Mean 13 | AC50                      | 3.3E-05 | Mean 88  | AC50                     | 4.3E-05 | Mean 138 | AC50                          | 5.3E-06 | Mean 592 | AC50                             | 3.3E-05 | Mean 273 |
| Min                      | -0.10   | StDev 13 | Min                         | 11.39   | StDev 2 | Min                       | 84.92   | StDev 19 | Min                      | 113.87  | StDev 22 | Min                           | 329.16  | StDev 13 | Min                              | 299.39  | StDev 15 |
| Max                      | 1.00    |          | Max                         | 9.50    |         | Max                       | 300.00  |          | Max                      | 2800.00 |          | Max                           | 900.00  |          | Max                              | 1000.00 |          |
| Slope                    | -6.65   |          | Slope                       | 0.00    |         | Slope                     | -4.44   |          | Slope                    | -7.10   |          | Slope                         | -0.12   |          | Slope                            | -11.64  |          |
| R^2                      | 0.99    |          | R^2                         | 0.64    |         | R^2                       | 0.98    |          | R^2                      | 0.97    |          | R^2                           | 0.32    |          | R^2                              | 0.83    |          |
| Fit QC                   | Pass    |          | Fit QC                      | NCF     |         | Fit QC                    | NCF     |          | Fit QC                   | NCF     |          | Fit QC                        | NCF     |          | Fit QC                           | NCF     |          |

**CellCiphr Hepatocyte Plate 2 Acute**

| Feature <b>Cell Loss</b> |         |          | Feature <b>Nuclear Size</b> |         |         | Feature <b>Mito Potential</b> |         |         | Feature <b>Steatosis</b> |         |          |
|--------------------------|---------|----------|-----------------------------|---------|---------|-------------------------------|---------|---------|--------------------------|---------|----------|
| Curve Fit                |         |          | Curve Fit                   |         |         | Curve Fit                     |         |         | Curve Fit                |         |          |
| AC50                     | 3.3E-05 | Mean 128 | AC50                        | 1.2E+01 | Mean 10 | AC50                          | 1.5E-09 | Mean 91 | AC50                     | 4.9E-06 | Mean 162 |
| Min                      | -0.05   | StDev 14 | Min                         | 15.16   | StDev 3 | Min                           | 133.94  | StDev 5 | Min                      | 133.28  | StDev 15 |
| Max                      | 1.00    |          | Max                         | 9.50    |         | Max                           | 40.00   |         | Max                      | 200.00  |          |
| Slope                    | -6.70   |          | Slope                       | 0.13    |         | Slope                         | 0.04    |         | Slope                    | -1.41   |          |
| R^2                      | 0.98    |          | R^2                         | 0.40    |         | R^2                           | 0.57    |         | R^2                      | 0.71    |          |
| Fit QC                   | Pass    |          | Fit QC                      | NCF     |         | Fit QC                        | NCF     |         | Fit QC                   | NCF     |          |

**CellCiphr Hepatocyte Plate 1 Early**

| Feature <b>Cell Loss</b> |         |          | Feature <b>Nuclear Size</b> |         |         | Feature <b>DNA Damage</b> |         |          | Feature <b>Apoptosis</b> |         |          | Feature <b>Lysosomal Mass</b> |         |          | Feature <b>DNA Fragmentation</b> |         |          |
|--------------------------|---------|----------|-----------------------------|---------|---------|---------------------------|---------|----------|--------------------------|---------|----------|-------------------------------|---------|----------|----------------------------------|---------|----------|
| Curve Fit                |         |          | Curve Fit                   |         |         | Curve Fit                 |         |          | Curve Fit                |         |          | Curve Fit                     |         |          | Curve Fit                        |         |          |
| AC50                     | 1.1E-05 | Mean 110 | AC50                        | 1.3E-05 | Mean 13 | AC50                      | 2.1E-05 | Mean 30  | AC50                     | 1.6E-05 | Mean 41  | AC50                          | 1.6E-06 | Mean 724 | AC50                             | 1.3E-05 | Mean 289 |
| Min                      | -0.13   | StDev 12 | Min                         | 12.56   | StDev 3 | Min                       | 32.12   | StDev 60 | Min                      | 40.21   | StDev 41 | Min                           | 856.36  | StDev 16 | Min                              | 310.83  | StDev 21 |
| Max                      | 1.00    |          | Max                         | 9.50    |         | Max                       | 400.00  |          | Max                      | 300.00  |          | Max                           | 739.11  |          | Max                              | 800.00  |          |
| Slope                    | -2.26   |          | Slope                       | -16.39  |         | Slope                     | -2.95   |          | Slope                    | -2.87   |          | Slope                         | 3.11    |          | Slope                            | -6.20   |          |
| R^2                      | 0.94    |          | R^2                         | 0.68    |         | R^2                       | 0.99    |          | R^2                      | 0.98    |          | R^2                           | 1.00    |          | R^2                              | 0.99    |          |
| Fit QC                   | Pass    |          | Fit QC                      | NCF     |         | Fit QC                    | Pass    |          | Fit QC                   | Pass    |          | Fit QC                        | NCF     |          | Fit QC                           | Pass    |          |

**CellCiphr Hepatocyte Plate 2 Early**

| Feature <b>Cell Loss</b> |         |          | Feature <b>Nuclear Size</b> |         |         | Feature <b>Mito Potential</b> |         |         | Feature <b>Steatosis</b> |         |          |
|--------------------------|---------|----------|-----------------------------|---------|---------|-------------------------------|---------|---------|--------------------------|---------|----------|
| Curve Fit                |         |          | Curve Fit                   |         |         | Curve Fit                     |         |         | Curve Fit                |         |          |
| AC50                     | 1.1E-05 | Mean 113 | AC50                        | 1.6E-06 | Mean 13 | AC50                          | 2.1E-05 | Mean 97 | AC50                     | 1.2E-05 | Mean 35  |
| Min                      | -0.15   | StDev 15 | Min                         | 12.73   | StDev 2 | Min                           | 97.11   | StDev 3 | Min                      | 30.86   | StDev 24 |
| Max                      | 1.00    |          | Max                         | 12.31   |         | Max                           | 5.00    |         | Max                      | 300.00  |          |
| Slope                    | -1.66   |          | Slope                       | 18.24   |         | Slope                         | -2.78   |         | Slope                    | -2.61   |          |
| R^2                      | 0.96    |          | R^2                         | 0.86    |         | R^2                           | 1.00    |         | R^2                      | 1.00    |          |
| Fit QC                   | Pass    |          | Fit QC                      | NCF     |         | Fit QC                        | Pass    |         | Fit QC                   | Pass    |          |

**CellCiphr Hepatocyte Plate 1 Chronic**

| Feature <b>Cell Loss</b> |         |          | Feature <b>Nuclear Size</b> |         |         | Feature <b>DNA Damage</b> |         |          | Feature <b>Apoptosis</b> |         |          | Feature <b>Lysosomal Mass</b> |         |          | Feature <b>DNA Fragmentation</b> |         |          |
|--------------------------|---------|----------|-----------------------------|---------|---------|---------------------------|---------|----------|--------------------------|---------|----------|-------------------------------|---------|----------|----------------------------------|---------|----------|
| Curve Fit                |         |          | Curve Fit                   |         |         | Curve Fit                 |         |          | Curve Fit                |         |          | Curve Fit                     |         |          | Curve Fit                        |         |          |
| AC50                     | 5.9E-06 | Mean 102 | AC50                        | 1.2E-04 | Mean 13 | AC50                      | 6.0E-06 | Mean 59  | AC50                     | 6.4E-06 | Mean 39  | AC50                          | 2.5E-06 | Mean 616 | AC50                             | 6.9E-06 | Mean 263 |
| Min                      | -0.07   | StDev 11 | Min                         | 20.67   | StDev 3 | Min                       | 77.18   | StDev 31 | Min                      | 41.09   | StDev 18 | Min                           | 702.21  | StDev 10 | Min                              | 305.36  | StDev 16 |
| Max                      | 1.00    |          | Max                         | 9.50    |         | Max                       | 400.00  |          | Max                      | 400.00  |          | Max                           | 587.83  |          | Max                              | 800.00  |          |
| Slope                    | -12.26  |          | Slope                       | 0.16    |         | Slope                     | -14.63  |          | Slope                    | -18.95  |          | Slope                         | 3.75    |          | Slope                            | -14.85  |          |
| R^2                      | 0.95    |          | R^2                         | 0.92    |         | R^2                       | 0.98    |          | R^2                      | 1.00    |          | R^2                           | 0.92    |          | R^2                              | 0.76    |          |
| Fit QC                   | Pass    |          | Fit QC                      | Pass    |         | Fit QC                    | Pass    |          | Fit QC                   | Pass    |          | Fit QC                        | NCF     |          | Fit QC                           | NCF     |          |

**CellCiphr Hepatocyte Plate 2 Chronic**

| Feature <b>Cell Loss</b> |         |          | Feature <b>Nuclear Size</b> |         |         | Feature <b>Mito Potential</b> |         |         | Feature <b>Steatosis</b> |         |          |
|--------------------------|---------|----------|-----------------------------|---------|---------|-------------------------------|---------|---------|--------------------------|---------|----------|
| Curve Fit                |         |          | Curve Fit                   |         |         | Curve Fit                     |         |         | Curve Fit                |         |          |
| AC50                     | 5.6E-06 | Mean 105 | AC50                        | 2.6E-06 | Mean 13 | AC50                          | 8.1E-06 | Mean 95 | AC50                     | 9.4E-06 | Mean 26  |
| Min                      | -0.26   | StDev 16 | Min                         | 12.49   | StDev 3 | Min                           | 96.33   | StDev 4 | Min                      | 30.52   | StDev 24 |
| Max                      | 1.00    |          | Max                         | 13.70   |         | Max                           | 5.00    |         | Max                      | 300.00  |          |
| Slope                    | -2.15   |          | Slope                       | -3.58   |         | Slope                         | -8.64   |         | Slope                    | -2.81   |          |
| R^2                      | 0.96    |          | R^2                         | 0.92    |         | R^2                           | 0.94    |         | R^2                      | 1.00    |          |
| Fit QC                   | Pass    |          | Fit QC                      | Pass    |         | Fit QC                        | Pass    |         | Fit QC                   | Pass    |          |

 -No Curve Fit (NCF)

 - Curve Fit passed QC. AC50 used in the profile
